# Supplementary material for: Development of an Early Warning and Incident Response System for the Protection of Visitors from Natural Hazards in Important Outdoor Sites in Greece
Source: MDPI journal article supplement (doi:10.3390/su13095143), 2021-05-04
Supplement: s1 [file s1]

Archive with 1 entries (1 files):
- sustainability-1174985-supplementary.pdf
